# Supplementary material for: Dual Stimuli-Responsive Orthodontic Aligners: An In Vitro Study
Source: MDPI journal article supplement (doi:10.3390/ma16083094), 2023-04-14
Supplement: s1 [file s1]

# Dual Stimuli-Responsive Orthodontic Aligners: An In Vitro Study

## Fourier-transform infrared (FTIR) spectroscopy

In the FT-IR spectrum of the synthesized TPU, a very weak signal occurred at about  $2270\text{ cm}^{-1}$ , indicating that only a few free isocyanate groups were available [1]. This speaks to an almost complete reaction. At the same time, vibration modes are present that are characteristic of the formation of a poly(ether urethane) (Figure S1).

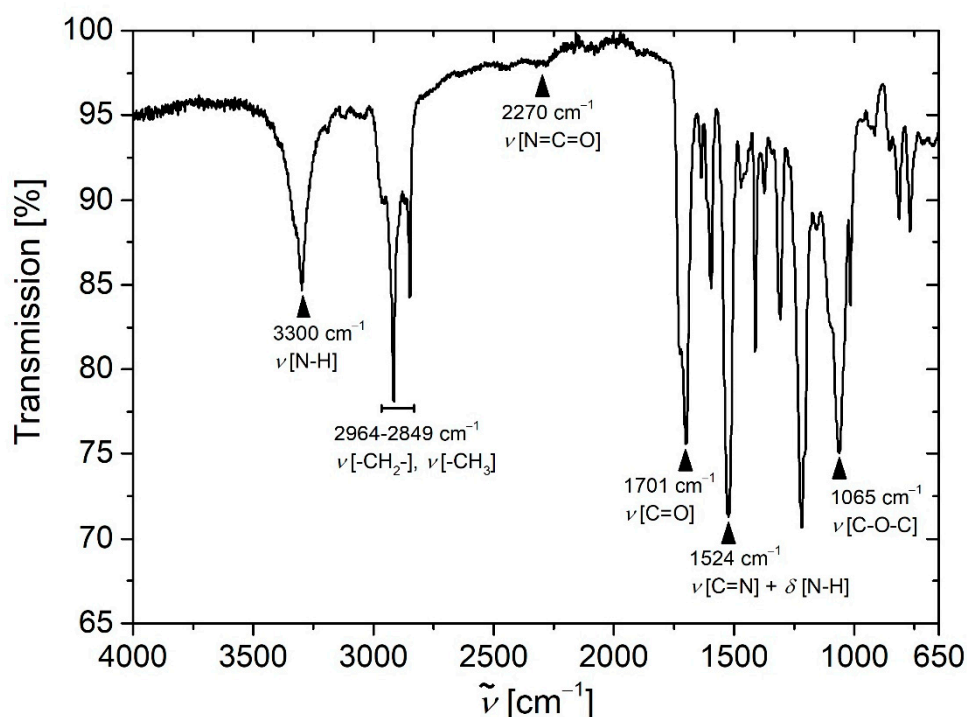

**Figure S1.** FT-IR spectrum of polypropylene glycol (PPG)-based poly(ether urethane), including the assignment of vibration modes and the specification of their wavenumbers.

A more detailed analysis of the FT-IR spectrum shows overlapping absorbances between  $2964\text{ cm}^{-1}$  and  $2849\text{ cm}^{-1}$ , which can be assigned to asymmetric and symmetric stretching vibrations of  $\text{CH}_2$  alkyl entities together with  $\text{CH}_3$  entities of the PPG side chain [2,3]. The absorbance band at  $1065\text{ cm}^{-1}$  can be assigned to the  $\nu[\text{C-O-C}]$  stretching vibrations of the PPG soft segment [3,4]. The stretching vibrations  $\nu[\text{N-H}]$  at  $3300\text{ cm}^{-1}$ ,  $\nu[\text{C=O}]$  in the carbonyl stretching region at  $1701\text{ cm}^{-1}$ , as well as an amide peak ( $\nu[\text{C=N}] + \delta[\text{N-H}]$ ) at  $1524\text{ cm}^{-1}$ , indicate the formation of the hard segment. The signals can be attributed to the formation of urethane species [3,5,6]. As a result, the reaction seemed to be successful.

## Cyclic thermomechanical measurements

**Table S1.** Dependence of shape memory properties of the synthesized TPU on cycle number. For  $T_{\text{low}}$  and  $T_{\text{high}}$ , 23 °C and 80 °C were selected, respectively, while  $\epsilon_{\text{max}}$  was set to 100%.

| Cycle number<br>N | Fixed strain<br>$\epsilon_u$ | Recovered strain<br>$\epsilon_r$ | Shape fixity ratio<br>$R_f(N)$ | Shape recovery ratio<br>$R_r(N)$ |
|-------------------|------------------------------|----------------------------------|--------------------------------|----------------------------------|
| 1                 | 100%                         | 37%                              | >99%                           | 63%                              |
| 2                 | 100%                         | 41%                              | >99%                           | 94%                              |
| 3                 | 100%                         | 43%                              | >99%                           | 97%                              |
| 4                 | 100%                         | 44%                              | >99%                           | 98%                              |
| 5                 | 100%                         | 45%                              | >99%                           | 98%                              |

**Table S2.** Dependence of shape memory properties of the synthesized TPU on  $\epsilon_{\text{max}}$ . For  $T_{\text{low}}$  and  $T_{\text{high}}$ , 23 °C and 80 °C were selected, respectively.

| Maximum strain applied<br>$\epsilon_{\text{max}}$ | Cycle number<br>N | Fixed strain<br>$\epsilon_u$ | Recovered strain<br>$\epsilon_r$ | Shape fixity ratio<br>$R_f(N)$ | Shape recovery ratio<br>$R_r(N)$ |
|---------------------------------------------------|-------------------|------------------------------|----------------------------------|--------------------------------|----------------------------------|
| 25%                                               | 1                 | 25%                          | 20%                              | >99%                           | 20%                              |
|                                                   | 2                 | 24%                          | 20%                              | 96%                            | >99%                             |
| 50%                                               | 1                 | 50%                          | 23%                              | >99%                           | 90%                              |
|                                                   | 2                 | 50%                          | 25%                              | >99%                           | 93%                              |
| 100%                                              | 1                 | 100%                         | 34%                              | >99%                           | 88%                              |
|                                                   | 2                 | 100%                         | 37%                              | >99%                           | 95%                              |
| 200%                                              | 1                 | 199%                         | 56%                              | >99%                           | 88%                              |
|                                                   | 2                 | 199%                         | 61%                              | >99%                           | 97%                              |

## References

1. Sáenz-Pérez, M.; Lizundia, E.; Laza, J.M.; García-Barrasa, J.; Vilas, J.L.; León, L.M. Methylene diphenyl diisocyanate (MDI) and toluene diisocyanate (TDI) based polyurethanes: thermal, shape-memory and mechanical behavior. *RSC Adv.* **2016**, *6*, 69094–69102, doi:10.1039/c6ra13492k.
2. Erdem, A. Synthesis and characterization of polypropylene glycol-based novel organogels as effective materials for the recovery of organic solvents. *J Appl Polym Sci* **2021**, *138*, 49997, doi:10.1002/app.49997.
3. Tan, C.; Tirri, T.; Wilen, C.-E. Investigation on the Influence of Chain Extenders on the Performance of One-Component Moisture-Curable Polyurethane Adhesives. *Polymers (Basel)* **2017**, *9*, doi:10.3390/polym9050184.
4. Zhang, Y.; Qi, Y.-h.; Zhang, Z.-p. The influence of 2,4-toluene diisocyanate content on the intrinsic self-healing performance of polyurethane at room-temperature. *J Polym Res* **2015**, *22*, doi:10.1007/s10965-015-0744-0.
5. Pirl Ertem, S.; Yilgor, E.; Kosak, C.; Wilkes, G.L.; Zhang, M.; Yilgor, I. Effect of soft segment molecular weight on tensile properties of poly(propylene oxide) based polyurethaneureas. *Polymer* **2012**, *53*, 4614–4622, doi:10.1016/j.polymer.2012.08.020.
6. Pretsch, T.; Jakob, I.; Müller, W. Hydrolytic degradation and functional stability of a segmented shape memory poly(ester urethane). *Polymer Degradation and Stability* **2009**, *94*, 61–73, doi:10.1016/j.polymdegradstab.2008.10.012.
